# Supplementary material
Source: PubMed Central journal article supplement (PMC5478279)
Supplement: NIHMS865344-supplement-Supplemental_Files.pdf [file NIHMS865344-supplement-Supplemental_Files.pdf]

Supplemental Table 1. Transects, sites codes, elevation, and latitude and longitude for animals captured in the hybrid zone.

| Transect        | Site Code   | Elev. (m) | Latitude    | Longitude   |             |
|-----------------|-------------|-----------|-------------|-------------|-------------|
| Balsam Mountain | PG          | 1609      | 35.56391995 | 83.16177777 |             |
|                 | CA          | 1719      | 35.57600245 | 83.16661544 |             |
|                 | SM          | 1719      | 35.61182943 | 83.17341010 |             |
|                 | PC          | 1390      | 35.62587308 | 83.17494958 |             |
|                 | PO          | 1402      | 35.63506813 | 83.18189032 |             |
|                 | BG          | 1597      | 35.64780588 | 83.20261272 |             |
|                 | BB          | 1743      | 35.60265632 | 83.18266536 |             |
|                 | CM          | 1780      | 35.59448665 | 83.18429759 |             |
|                 | HC          | 1707      | 35.58762766 | 83.18325042 |             |
|                 | CB          | 1792      | 35.57927508 | 83.17757258 |             |
|                 | LC          | 1475      | 35.63881075 | 83.19269241 |             |
|                 | FR          | 1402      | 35.61897075 | 83.18275550 |             |
|                 | LB          | 1548      | 35.64003041 | 83.20141642 |             |
|                 | SP          | 1707      | 35.60772728 | 83.17742746 |             |
|                 | BH          | 1707      | 35.65601586 | 83.19533869 |             |
|                 | LG          | 1670      | 35.66442415 | 83.18705236 |             |
|                 | ST          | 1597      | 35.55633270 | 83.16211448 |             |
|                 | DB          | 1768      | 35.68424458 | 83.20981273 |             |
|                 | BI          | 1707      | 35.67418439 | 83.19162726 |             |
|                 | HT          | 1402      | 35.53020408 | 83.17087478 |             |
|                 | LU          | 1829      | 35.68998283 | 83.21979420 |             |
|                 | TB          | 1804      | 35.69133307 | 83.23495880 |             |
|                 | GF          | 1634      | 35.67858068 | 83.20113841 |             |
|                 | WK          | 1634      | 35.54805040 | 83.15396128 |             |
|                 | Hyatt Ridge | HS        | 1414        | 35.60886296 | 83.24311502 |
|                 |             | JC        | 1719        | 35.61778960 | 83.23911412 |
|                 |             | HB        | 1500        | 35.62823755 | 83.23473519 |
|                 |             | MS        | 1536        | 35.63775908 | 83.23799285 |
| QB              |             | 1512      | 35.60026432 | 83.24643994 |             |
| SK              |             | 1500      | 35.59652094 | 83.24994428 |             |
| RR              |             | 1378      | 35.59175893 | 83.25007582 |             |
| MH              |             | 1390      | 35.61473777 | 83.24179986 |             |
| QS              |             | 1512      | 35.59844068 | 83.24803346 |             |
| QU              |             | 1524      | 35.60440438 | 83.24534156 |             |
| HY              |             | 1414      | 35.62363991 | 83.23620805 |             |
| RF              |             | 1481      | 35.64342471 | 83.23435206 |             |
| Palmer Creek    | BN          | 1536      | 35.63347478 | 83.23522333 |             |
|                 | BE          | 1122      | 35.63002728 | 83.15551872 |             |
|                 | PC          | 1390      | 35.62587308 | 83.17494958 |             |
|                 | TR          | 1305      | 35.62835489 | 83.16980536 |             |
|                 | BD          | 1219      | 35.62859372 | 83.16005132 |             |

|             |    |      |             |             |
|-------------|----|------|-------------|-------------|
|             | BC | 1280 | 35.62936480 | 83.16579152 |
|             | BF | 1061 | 35.63301985 | 83.15201048 |
|             | BJ | 1000 | 35.63377620 | 83.14348422 |
|             | BK | 951  | 35.63799563 | 83.13179235 |
| Mt Sterling | ZI | 1768 | 35.69926099 | 83.12346552 |
|             | ZB | 1207 | 35.69795847 | 83.09910776 |
|             | ZE | 1451 | 35.69957733 | 83.10909630 |
|             | ZD | 1329 | 35.69787315 | 83.10758163 |
|             | ZL | 1585 | 35.69144561 | 83.12905953 |
|             | ZM | 1561 | 35.68843010 | 83.13338816 |
|             | ZK | 1646 | 35.69491291 | 83.12619018 |
|             | ZJ | 1695 | 35.69779646 | 83.12370294 |
|             | ZH | 1622 | 35.69982399 | 83.11864002 |
|             | ZF | 1451 | 35.70187413 | 83.11279277 |
|             | ZG | 1536 | 35.70117879 | 83.11439897 |
|             | ZC | 1280 | 35.69900670 | 83.10565542 |
|             | ZA | 1134 | 35.69457493 | 83.09619011 |

---

Supplemental Table 2. Sites codes, elevation, and latitude and longitude for parental taxa.

| Species                  | Site Code | Elev. (m) | Latitude    | Longitude   |
|--------------------------|-----------|-----------|-------------|-------------|
| <i>Plethodon jordani</i> | SH        | 1600      | 35.61192974 | 83.41908953 |
|                          | JR        | 1524      | 35.56044427 | 83.72307361 |
|                          | PE        | 1600      | 35.65003605 | 83.30803398 |
|                          | GU        | 1951      | 35.70336446 | 83.26300058 |
|                          | CS        | 1539      | 35.57753645 | 83.60428684 |
|                          | VF        | 1353      | 35.51853193 | 83.85393919 |
|                          | MB        | 1978      | 35.56004153 | 83.50680322 |
|                          | CO        | 1573      | 35.72775821 | 83.18706962 |
| <i>P. metcalfi</i>       | WK        | 1609      | 35.54654147 | 83.15465992 |
|                          | WR        | 1707      | 35.46220459 | 83.13776387 |
|                          | TA        | 1695      | 35.29046957 | 82.91683637 |
|                          | MP        | 1561      | 35.42294145 | 82.75138204 |
|                          | CL        | 1631      | 35.40413851 | 82.86246472 |
|                          | LK        | 1707      | 35.37606578 | 83.03479743 |
| <i>P. teyahalee</i>      | CK        | 1707      | 35.60772728 | 83.17742746 |
|                          | VA        | 863       | 35.74326344 | 83.27905659 |
|                          | VB        | 671       | 35.55596160 | 83.31333018 |
|                          | VD        | 1329      | 35.62904920 | 83.08786358 |
|                          | VE        | 881       | 35.61496116 | 83.12378423 |
|                          | SB        | 975       | 35.62684900 | 83.11931790 |

Supplemental Table 3. Pure parental individuals (*Plethodon jordani*, *P. metcalfi*, and *P. teyahalee*) and marker scores used in panel for marker development.

| Species             | Site Code <sup>1</sup> | Indiv. Code <sup>2</sup> | SVL (mm) <sup>3</sup> | Cheek Score <sup>4</sup> | White Flecks | mtDNA  | nDNA |     |
|---------------------|------------------------|--------------------------|-----------------------|--------------------------|--------------|--------|------|-----|
| <i>P. jordani</i>   | MB                     | 97                       | 55                    | 10                       | Absent       | J      | n/a  |     |
|                     |                        | 98                       | 39                    | 4                        | Absent       | J      | n/a  |     |
|                     | CO                     | 306                      | 43                    | 3                        | Absent       | J      | n/a  |     |
|                     |                        | 307                      | 48                    | 10                       | Absent       | J      | n/a  |     |
|                     | SH                     | 332                      | 58                    | 11                       | Absent       | J      | J/J  |     |
|                     |                        | 333                      | 48                    | 7                        | Absent       | J      | J/J  |     |
|                     | JR                     | 340                      | 41                    | 7                        | Absent       | J      | J/J  |     |
|                     |                        | 341                      | 42                    | 11                       | Absent       | J      | J/J  |     |
|                     | PE                     | 402                      | 43                    | 7                        | Absent       | J      | J/J  |     |
|                     |                        | 403                      | 41                    | 4                        | Absent       | J      | J/J  |     |
|                     | GU                     | 435                      | 47                    | 12                       | Absent       | J      | n/a  |     |
|                     |                        | 436                      | 55                    | 12                       | Absent       | J      | J/J  |     |
|                     |                        | 437                      | 36                    | 6                        | Absent       | J      | n/a  |     |
|                     | CS                     | 438                      | 67                    | 8                        | Absent       | J      | J/J  |     |
|                     |                        | 447                      | 43                    | 4                        | Absent       | J      | J/J  |     |
|                     |                        | 448                      | 42                    | 9                        | Absent       | J      | J/J  |     |
|                     | VF                     | 942                      | 43                    | 3                        | Absent       | J      | J/J  |     |
|                     |                        | 944                      | 47                    | 4                        | Absent       | J      | J/J  |     |
|                     | <i>P. metcalfi</i>     | WK                       | 64                    | 53                       | 0            | Absent | M    | M/M |
|                     |                        |                          | 65                    | 60                       | 0            | Absent | M    | M/M |
| 66                  |                        |                          | 65                    | 0                        | Absent       | M      | M/M  |     |
| WR                  |                        | 201                      | 52                    | 0                        | Absent       | M      | n/a  |     |
|                     |                        | 202                      | 31                    | 0                        | Absent       | M      | n/a  |     |
|                     |                        | 203                      | 29                    | 0                        | Absent       | M      | M/M  |     |
| TA                  |                        | 372                      | 49                    | 0                        | Absent       | M      | n/a  |     |
|                     |                        | 373                      | 38                    | 0                        | Absent       | M      | M/M  |     |
|                     |                        | 374                      | 32                    | 0                        | Absent       | M      | M/M  |     |
|                     |                        | 375                      | 45                    | 0                        | Absent       | M      | n/a  |     |
|                     |                        | 376                      | 48                    | 0                        | Absent       | M      | M/M  |     |
| MP                  |                        | 377                      | 54                    | 0                        | Absent       | M      | n/a  |     |
|                     |                        | 382                      | 52                    | 0                        | Absent       | M      | M/M  |     |
| CL                  |                        | 383                      | 31                    | 0                        | Absent       | M      | M/M  |     |
|                     |                        | 424                      | 30                    | 0                        | Absent       | M      | M/M  |     |
| LK                  |                        | 425                      | 50                    | 0                        | Absent       | M      | M/M  |     |
|                     |                        | 426                      | 55                    | 0                        | Absent       | M      | n/a  |     |
|                     |                        | 427                      | 31                    | 0                        | Absent       | M      | n/a  |     |
|                     |                        | 365                      | 54                    | 0                        | Absent       | M      | n/a  |     |
|                     |                        | 366                      | 50                    | 0                        | Absent       | M      | n/a  |     |
| <i>P. teyahalee</i> | CK                     | 367                      | 49                    | 0                        | Absent       | M      | n/a  |     |
|                     |                        | 222                      | 66                    | 0                        | Present      | T      | T/T  |     |
|                     |                        | 223                      | 27                    | 0                        | Present      | T      | n/a  |     |
|                     | VA                     | 224                      | 44                    | 0                        | Present      | T      | T/T  |     |
|                     |                        | 902                      | 55                    | 0                        | Present      | T      | T/T  |     |
|                     | VB                     | 911                      | 66                    | 0                        | Present      | T      | T/T  |     |
|                     |                        | 912                      | 65                    | 0                        | Present      | T      | T/T  |     |
|                     |                        | 914                      | 60                    | 0                        | Present      | T      | n/a  |     |
| VD                  | 932                    | 44                       | 0                     | Present                  | T            | T/T    |      |     |
| VE                  | 935                    | 58                       | 0                     | Present                  | T            | T/T    |      |     |
|                     | 937                    | 43                       | 0                     | Present                  | T            | T/T    |      |     |

|    |     |    |   |         |   |     |
|----|-----|----|---|---------|---|-----|
|    | 938 | 42 | 0 | Present | T | n/a |
| SB | 327 | 19 | 0 | Present | T | n/a |
|    | 329 | 69 | 0 | Present | T | n/a |

---

<sup>1</sup> See Figure 1 and Supplemental Table 1 for site locations.

<sup>2</sup> Individual codes are those assigned by the author.

<sup>3</sup> SVL (Snout Vent Length) was measured from the tip of the snout to the posterior end of the cloaca.

<sup>4</sup> Cheek pigmentation was scored on a scale of 0 to 13, with 0 indicating a complete lack of red pigmentation and 13 indicating extensive and bright red pigment.

Supplemental Table 4. Samples (arranged by transect) and marker scores for all samples used in analyses.

| Transect   | Site Code <sup>1</sup> | Indiv. Code <sup>2</sup> | SVL (mm) <sup>3</sup> | Cheek Score <sup>4</sup> | White Flecks | mtDNA   | nDNA |     |
|------------|------------------------|--------------------------|-----------------------|--------------------------|--------------|---------|------|-----|
| Balsam Mtn | PG                     | 1                        | 35                    | 0                        | Absent       | M       | J/M  |     |
|            |                        | 2                        | 50                    | 0                        | Absent       | M       | M/M  |     |
|            |                        | 3                        | 52                    | 0                        | Absent       | M       | J/J  |     |
|            |                        | 4                        | 36                    | 0                        | Absent       | M       | J/J  |     |
|            |                        | 5                        | 58                    | 0                        | Absent       | M       | J/M  |     |
|            |                        | 6                        | 54                    | 0                        | Absent       | M       | J/J  |     |
|            |                        | 7                        | 48                    | 0                        | Absent       | M       | J/M  |     |
|            |                        | 8                        | 50                    | 0                        | Absent       | M       | J/M  |     |
|            |                        | 9                        | 54                    | 1                        | Absent       | M       | J/J  |     |
|            |                        | 10                       | 57                    | 0                        | Absent       | M       | M/M  |     |
|            | CA                     | CA                       | 11                    | 38                       | 0            | Absent  | M    | J/J |
|            |                        |                          | 12                    | 37                       | 3            | Absent  | M    | J/J |
|            |                        |                          | 13                    | 35                       | 6            | Absent  | M    | J/J |
|            |                        |                          | 14                    | 40                       | 0            | Absent  | M    | J/J |
|            |                        |                          | 15                    | 36                       | 7            | Absent  | M    | J/J |
|            |                        |                          | 47                    | 50                       | 11           | Absent  | M    | J/J |
|            |                        |                          | 48                    | 37                       | 6            | Absent  | M    | J/M |
|            |                        |                          | 49                    | 45                       | 3            | Absent  | M    | J/J |
|            |                        |                          | 50                    | 52                       | 9            | Absent  | M    | J/M |
|            |                        |                          | 51                    | 60                       | 5            | Absent  | M    | J/J |
|            | SM                     | SM                       | 16                    | 54                       | 9            | Absent  | M    | J/M |
|            |                        |                          | 17                    | 58                       | 0            | Absent  | M    | J/J |
|            |                        |                          | 18                    | 53                       | 10           | Absent  | M    | J/J |
|            |                        |                          | 19                    | 41                       | 2            | Absent  | M    | J/J |
|            |                        |                          | 20                    | 57                       | 11           | Absent  | M    | J/J |
|            |                        |                          | 21                    | 43                       | 9            | Absent  | M    | J/J |
|            |                        |                          | 22                    | 50                       | 11           | Absent  | M    | J/J |
|            |                        |                          | 23                    | 49                       | 10           | Absent  | M    | J/T |
|            |                        |                          | 24                    | 51                       | 9            | Present | M    | J/J |
|            |                        |                          | 25                    | 32                       | 1            | Absent  | M    | J/J |
|            | PC                     | PC                       | 26                    | 30                       | 0            | Absent  | M    | M/M |
|            |                        |                          | 27                    | 38                       | 1            | Absent  | M    | J/J |
|            |                        |                          | 28                    | 43                       | 0            | Absent  | M    | M/M |
|            |                        |                          | 29                    | 52                       | 0            | Absent  | M    | J/M |
|            |                        |                          | 30                    | 29                       | 0            | Absent  | M    | J/M |
|            |                        |                          | 32                    | 45                       | 0            | Absent  | M    | J/M |
|            |                        |                          | 33                    | 50                       | 0            | Absent  | M    | M/M |
|            |                        |                          | 34                    | 47                       | 0            | Absent  | M    | J/M |
|            |                        |                          | 35                    | 50                       | 0            | Absent  | M    | M/M |
|            |                        |                          | 36                    | 50                       | 9            | Absent  | M    | J/J |
|            | PO                     | PO                       | 37                    | 53                       | 0            | Absent  | M    | J/J |
|            |                        |                          | 42                    | 58                       | 0            | Absent  | M    | M/M |
|            |                        |                          | 43                    | 44                       | 0            | Absent  | M    | J/M |
|            |                        |                          | 44                    | 57                       | 1            | Absent  | M    | J/M |
|            |                        |                          | 45                    | 32                       | 0            | Absent  | M    | J/M |
|            | BG                     | BG                       | 46                    | 28                       | 0            | Absent  | M    | J/M |
|            |                        |                          | 52                    | 67                       | 10           | Absent  | M    | J/J |
|            |                        |                          | 53                    | 63                       | 7            | Absent  | M    | J/J |
|            |                        |                          | 54                    | 61                       | 8            | Absent  | M    | J/J |

|    |     |    |    |         |   |     |
|----|-----|----|----|---------|---|-----|
|    | 55  | 38 | 12 | Absent  | M | J/J |
|    | 56  | 47 | 0  | Absent  | M | J/J |
|    | 57  | 60 | 5  | Absent  | M | J/J |
|    | 58  | 58 | 4  | Absent  | M | J/J |
|    | 59  | 64 | 2  | Absent  | M | J/T |
|    | 60  | 55 | 4  | Absent  | M | J/J |
|    | 61  | 33 | 8  | Absent  | M | J/J |
| BB | 67  | 43 | 4  | Absent  | J | J/J |
|    | 69  | 27 | 7  | Absent  | J | J/J |
|    | 70  | 31 | 4  | Absent  | J | J/J |
|    | 71  | 31 | 1  | Absent  | J | J/J |
|    | 72  | 48 | 5  | Absent  | J | J/J |
|    | 73  | 59 | 11 | Absent  | J | J/J |
|    | 74  | 29 | 11 | Absent  | J | J/J |
|    | 75  | 54 | 5  | Absent  | J | J/J |
| CM | 77  | 60 | 3  | Absent  | J | J/J |
|    | 78  | 54 | 1  | Absent  | J | J/J |
|    | 79  | 43 | 1  | Absent  | M | J/J |
|    | 80  | 55 | 10 | Absent  | M | J/J |
|    | 81  | 45 | 4  | Absent  | J | J/J |
|    | 82  | 70 | 11 | Absent  | M | J/J |
|    | 83  | 58 | 6  | Absent  | J | J/J |
|    | 84  | 46 | 2  | Absent  | J | J/J |
|    | 85  | 60 | 3  | Absent  | J | J/J |
| HC | 132 | 33 | 0  | Absent  | M | J/M |
|    | 133 | 48 | 0  | Absent  | M | J/T |
|    | 134 | 33 | 6  | Absent  | M | J/J |
|    | 135 | 58 | 1  | Absent  | M | J/M |
|    | 136 | 41 | 3  | Absent  | M | J/M |
|    | 137 | 47 | 1  | Absent  | M | J/J |
|    | 138 | 47 | 7  | Absent  | M | J/M |
|    | 139 | 63 | 0  | Absent  | M | J/M |
|    | 140 | 66 | 0  | Absent  | M | J/J |
|    | 141 | 45 | 0  | Absent  | M | J/J |
| CB | 142 | 54 | 0  | Absent  | M | M/M |
|    | 143 | 48 | 4  | Absent  | M | J/J |
|    | 144 | 60 | 0  | Absent  | M | M/M |
|    | 145 | 48 | 0  | Absent  | M | M/M |
|    | 146 | 65 | 0  | Absent  | M | M/M |
|    | 147 | 61 | 0  | Absent  | M | M/M |
|    | 148 | 55 | 0  | Absent  | M | M/M |
|    | 149 | 45 | 5  | Absent  | M | J/J |
|    | 150 | 47 | 0  | Absent  | M | M/M |
|    | 151 | 57 | 0  | Absent  | M | M/M |
| LC | 152 | 58 | 0  | Present | T | J/J |
|    | 153 | 56 | 2  | Present | T | J/J |
|    | 154 | 42 | 2  | Absent  | M | J/J |
|    | 155 | 47 | 1  | Absent  | M | J/J |
|    | 156 | 62 | 0  | Present | T | T/T |
|    | 157 | 37 | 0  | Present | T | T/T |
|    | 159 | 38 | 0  | Present | T | J/J |
|    | 160 | 41 | 1  | Present | M | T/T |
|    | 161 | 40 | 1  | Present | T | T/T |

|    |     |    |    |         |   |     |
|----|-----|----|----|---------|---|-----|
|    | 193 | 41 | 0  | Absent  | T | T/T |
|    | 194 | 39 | 0  | Absent  | T | J/T |
|    | 195 | 55 | 0  | Absent  | T | J/M |
| FR | 167 | 62 | 11 | Absent  | M | J/J |
|    | 168 | 60 | 4  | Absent  | M | J/T |
|    | 174 | 54 | 5  | Absent  | M | J/M |
|    | 175 | 60 | 12 | Absent  | M | J/J |
|    | 176 | 53 | 2  | Absent  | M | J/J |
|    | 177 | 50 | 0  | Absent  | M | J/T |
|    | 179 | 50 | 12 | Absent  | T | J/T |
|    | 180 | 57 | 12 | Absent  | M | J/J |
| LB | 182 | 57 | 1  | Absent  | T | J/J |
|    | 183 | 57 | 10 | Absent  | M | J/M |
|    | 184 | 52 | 1  | Absent  | M | M/M |
|    | 185 | 56 | 1  | Absent  | M | J/M |
|    | 186 | 64 | 0  | Present | M | J/M |
|    | 187 | 58 | 3  | Absent  | M | J/J |
|    | 188 | 33 | 0  | Absent  | M | J/J |
|    | 189 | 55 | 1  | Absent  | M | J/T |
|    | 190 | 55 | 0  | Absent  | M | J/J |
|    | 191 | 36 | 6  | Absent  | M | J/J |
|    | 192 | 36 | 1  | Absent  | M | J/J |
| SP | 281 | 33 | 5  | Present | M | J/J |
|    | 282 | 50 | 5  | Absent  | J | J/J |
|    | 283 | 50 | 9  | Absent  | J | J/J |
|    | 284 | 34 | 12 | Absent  | M | J/J |
|    | 285 | 32 | 2  | Absent  | M | J/J |
|    | 286 | 48 | 10 | Absent  | M | J/J |
|    | 287 | 45 | 12 | Present | M | J/J |
|    | 288 | 49 | 13 | Absent  | M | J/J |
|    | 289 | 50 | 11 | Absent  | M | J/J |
| BH | 290 | 56 | 8  | Absent  | M | J/J |
|    | 291 | 58 | 13 | Absent  | J | J/J |
|    | 292 | 57 | 8  | Absent  | J | J/J |
|    | 293 | 51 | 9  | Absent  | M | J/J |
|    | 294 | 52 | 6  | Absent  | M | J/J |
|    | 295 | 66 | 9  | Absent  | J | J/J |
|    | 296 | 62 | 6  | Absent  | J | J/J |
|    | 297 | 60 | 9  | Absent  | J | J/M |
|    | 298 | 63 | 3  | Absent  | J | J/J |
|    | 299 | 62 | 6  | Absent  | M | J/J |
| LG | 300 | 51 | 8  | Absent  | J | J/M |
|    | 301 | 60 | 10 | Absent  | M | J/J |
|    | 302 | 60 | 12 | Absent  | M | J/J |
|    | 303 | 48 | 3  | Absent  | M | J/J |
|    | 304 | 50 | 4  | Absent  | M | J/J |
|    | 305 | 62 | 6  | Absent  | M | J/J |
| TR | 317 | 41 | 0  | Absent  | M | M/M |
|    | 318 | 46 | 0  | Absent  | M | M/M |
|    | 319 | 50 | 1  | Present | M | J/M |
|    | 320 | 42 | 0  | Absent  | M | M/M |
|    | 321 | 41 | 1  | Present | M | M/M |
| ST | 526 | 39 | 0  | Absent  | M | M/M |



|    |     |    |    |        |   |     |
|----|-----|----|----|--------|---|-----|
|    | 527 | 32 | 0  | Absent | M | M/M |
|    | 528 | 49 | 0  | Absent | M | J/M |
|    | 529 | 53 | 0  | Absent | M | M/M |
|    | 530 | 53 | 0  | Absent | M | M/M |
|    | 531 | 42 | 0  | Absent | M | M/M |
|    | 532 | 50 | 0  | Absent | M | M/M |
|    | 533 | 38 | 0  | Absent | M | M/M |
|    | 534 | 36 | 0  | Absent | M | J/J |
|    | 535 | 44 | 0  | Absent | M | J/M |
|    | 536 | 47 | 0  | Absent | M | M/M |
| DB | 537 | 53 | 7  | Absent | J | J/J |
|    | 538 | 45 | 8  | Absent | J | J/J |
|    | 540 | 48 | 4  | Absent | M | J/J |
|    | 541 | 55 | 7  | Absent | J | J/J |
|    | 542 | 54 | 11 | Absent | J | J/M |
|    | 543 | 53 | 6  | Absent | J | J/J |
|    | 544 | 44 | 4  | Absent | J | J/J |
|    | 545 | 59 | 7  | Absent | J | J/J |
|    | 546 | 62 | 10 | Absent | J | J/J |
|    | 547 | 51 | 8  | Absent | M | J/J |
|    | 548 | 49 | 9  | Absent | J | J/J |
|    | 549 | 63 | 8  | Absent | M | J/J |
|    | 550 | 54 | 11 | Absent | J | J/J |
| BI | 551 | 59 | 12 | Absent | M | J/J |
|    | 552 | 36 | 9  | Absent | M | J/J |
|    | 554 | 48 | 10 | Absent | J | J/J |
|    | 555 | 32 | 10 | Absent | J | J/J |
|    | 556 | 30 | 11 | Absent | J | J/J |
|    | 557 | 34 | 9  | Absent | J | J/J |
|    | 558 | 54 | 12 | Absent | M | J/J |
|    | 559 | 54 | 10 | Absent | M | J/J |
|    | 560 | 53 | 9  | Absent | J | J/J |
|    | 561 | 60 | 11 | Absent | M | J/J |
|    | 562 | 50 | 7  | Absent | J | J/J |
|    | 563 | 53 | 10 | Absent | J | J/J |
|    | 564 | 37 | 9  | Absent | M | J/J |
|    | 565 | 30 | 9  | Absent | M | J/M |
|    | 566 | 30 | 7  | Absent | M | J/J |
| GF | 567 | 43 | 12 | Absent | J | J/M |
|    | 569 | 52 | 9  | Absent | M | J/J |
|    | 570 | 55 | 10 | Absent | M | J/J |
|    | 571 | 55 | 9  | Absent | J | J/M |
|    | 572 | 54 | 12 | Absent | J | J/M |
|    | 573 | 71 | 9  | Absent | J | J/J |
|    | 574 | 53 | 10 | Absent | M | J/M |
|    | 575 | 55 | 7  | Absent | M | J/J |
|    | 576 | 47 | 9  | Absent | M | J/J |
|    | 577 | 53 | 9  | Absent | M | J/J |
|    | 579 | 63 | 8  | Absent | J | J/J |
|    | 580 | 52 | 10 | Absent | M | J/J |
|    | 581 | 46 | 12 | Absent | J | J/J |
| HT | 582 | 46 | 0  | Absent | M | M/M |
|    | 583 | 41 | 0  | Absent | M | M/M |

|    |     |    |    |         |   |     |
|----|-----|----|----|---------|---|-----|
|    | 584 | 33 | 0  | Absent  | M | M/M |
|    | 585 | 53 | 0  | Absent  | M | M/M |
|    | 586 | 48 | 0  | Absent  | M | M/M |
|    | 587 | 49 | 0  | Absent  | M | M/M |
|    | 588 | 49 | 0  | Absent  | M | M/M |
|    | 589 | 34 | 0  | Absent  | M | M/M |
|    | 590 | 48 | 0  | Absent  | M | M/M |
|    | 591 | 51 | 0  | Absent  | M | M/M |
|    | 592 | 45 | 0  | Absent  | M | M/M |
|    | 593 | 58 | 0  | Absent  | M | M/M |
|    | 594 | 36 | 0  | Absent  | M | M/M |
|    | 595 | 40 | 0  | Absent  | M | M/M |
|    | 596 | 53 | 0  | Absent  | M | M/M |
|    | 597 | 65 | 0  | Present | T | M/M |
| BU | 665 | 54 | 6  | Absent  | M | J/J |
|    | 666 | 54 | 12 | Absent  | M | J/J |
|    | 667 | 56 | 7  | Absent  | M | J/M |
|    | 668 | 62 | 9  | Absent  | M | J/J |
|    | 669 | 63 | 8  | Absent  | M | J/J |
|    | 670 | 51 | 5  | Absent  | M | J/J |
|    | 671 | 56 | 11 | Absent  | M | J/J |
|    | 672 | 30 | 9  | Absent  | M | J/J |
|    | 673 | 59 | 10 | Absent  | M | J/J |
|    | 674 | 34 | 12 | Absent  | M | J/J |
|    | 675 | 50 | 10 | Absent  | M | J/J |
|    | 676 | 55 | 8  | Absent  | M | J/J |
|    | 677 | 45 | 10 | Absent  | M | J/J |
|    | 678 | 32 | 4  | Absent  | J | J/J |
|    | 679 | 59 | 12 | Absent  | J | J/J |
| BA | 680 | 38 | 3  | Absent  | M | J/J |
|    | 681 | 62 | 13 | Absent  | M | J/J |
|    | 682 | 50 | 10 | Absent  | M | J/J |
|    | 683 | 53 | 10 | Absent  | M | J/J |
|    | 684 | 55 | 9  | Absent  | M | J/J |
|    | 685 | 37 | 5  | Absent  | M | J/J |
|    | 686 | 41 | 8  | Absent  | M | J/J |
|    | 687 | 56 | 10 | Absent  | M | J/J |
|    | 688 | 31 | 7  | Absent  | M | J/J |
|    | 689 | 54 | 10 | Absent  | M | J/J |
|    | 690 | 56 | 11 | Absent  | M | J/J |
|    | 691 | 53 | 6  | Absent  | M | J/J |
|    | 692 | 60 | 10 | Absent  | M | J/J |
|    | 694 | 37 | 6  | Absent  | M | J/J |
| LU | 695 | 49 | 5  | Absent  | J | J/J |
|    | 696 | 55 | 7  | Absent  | J | J/J |
|    | 697 | 63 | 5  | Absent  | J | J/J |
|    | 698 | 53 | 6  | Absent  | J | J/J |
|    | 699 | 52 | 11 | Absent  | J | J/J |
|    | 700 | 54 | 10 | Absent  | J | J/J |
|    | 701 | 41 | 1  | Absent  | J | J/J |
|    | 702 | 64 | 9  | Absent  | J | J/J |
|    | 703 | 55 | 7  | Absent  | J | J/J |
|    | 704 | 50 | 6  | Absent  | J | J/J |

|             |    |     |    |    |         |   |     |
|-------------|----|-----|----|----|---------|---|-----|
|             |    | 705 | 49 | 10 | Absent  | J | J/J |
|             |    | 706 | 54 | 9  | Absent  | J | J/J |
|             |    | 707 | 58 | 6  | Absent  | J | J/J |
|             |    | 708 | 53 | 6  | Absent  | J | J/M |
|             |    | 709 | 59 | 4  | Absent  | J | J/M |
|             | TB | 710 | 40 | 6  | Absent  | J | J/M |
|             |    | 711 | 50 | 12 | Absent  | J | J/J |
|             |    | 712 | 44 | 4  | Absent  | J | J/J |
|             |    | 713 | 32 | 3  | Absent  | J | J/J |
|             |    | 714 | 44 | 6  | Absent  | J | J/J |
|             |    | 715 | 53 | 5  | Absent  | J | J/M |
|             |    | 716 | 39 | 9  | Absent  | J | J/J |
|             |    | 717 | 54 | 7  | Absent  | J | J/J |
|             |    | 719 | 55 | 6  | Absent  | J | J/J |
|             |    | 720 | 50 | 6  | Absent  | J | J/J |
|             |    | 721 | 47 | 7  | Absent  | J | J/J |
|             |    | 722 | 36 | 7  | Absent  | J | J/J |
|             |    | 723 | 57 | 11 | Absent  | J | J/J |
|             |    | 724 | 50 | 11 | Absent  | J | J/M |
| Hyatt Ridge | HS | 231 | 52 | 2  | Absent  | M | J/M |
|             |    | 232 | 52 | 0  | Absent  | M | J/J |
|             |    | 233 | 45 | 0  | Absent  | M | J/M |
|             |    | 234 | 56 | 0  | Absent  | M | J/J |
|             |    | 235 | 47 | 0  | Absent  | M | M/M |
|             |    | 236 | 43 | 0  | Absent  | M | M/M |
|             |    | 237 | 38 | 0  | Absent  | M | M/M |
|             |    | 238 | 37 | 0  | Absent  | M | M/M |
|             |    | 239 | 42 | 0  | Absent  | M | M/M |
|             |    | 240 | 48 | 0  | Absent  | M | M/M |
|             | JC | 241 | 55 | 6  | Absent  | J | J/M |
|             |    | 242 | 35 | 1  | Absent  | J | J/M |
|             |    | 243 | 53 | 4  | Absent  | J | J/M |
|             |    | 244 | 31 | 1  | Absent  | J | J/M |
|             |    | 245 | 55 | 8  | Absent  | J | J/M |
|             |    | 246 | 55 | 0  | Absent  | J | J/M |
|             |    | 247 | 37 | 0  | Absent  | J | M/M |
|             |    | 248 | 32 | 0  | Absent  | M | J/M |
|             |    | 249 | 33 | 0  | Absent  | M | M/M |
|             |    | 250 | 28 | 0  | Present | M | J/M |
|             | HB | 251 | 59 | 4  | Absent  | J | J/J |
|             |    | 252 | 59 | 1  | Absent  | J | J/J |
|             |    | 253 | 32 | 4  | Present | J | J/J |
|             |    | 254 | 60 | 12 | Present | J | J/M |
|             |    | 255 | 59 | 10 | Absent  | J | J/J |
|             |    | 256 | 65 | 4  | Absent  | J | J/J |
|             |    | 257 | 54 | 4  | Absent  | J | J/J |
|             |    | 258 | 55 | 6  | Absent  | J | J/J |
|             |    | 259 | 62 | 5  | Absent  | J | J/J |
|             |    | 260 | 48 | 4  | Absent  | J | J/M |
|             | MS | 261 | 49 | 10 | Absent  | J | J/J |
|             |    | 262 | 21 | 5  | Absent  | J | J/J |
|             |    | 263 | 51 | 6  | Absent  | J | J/J |
|             |    | 264 | 39 | 5  | Absent  | J | J/J |

|    |     |    |    |         |   |     |
|----|-----|----|----|---------|---|-----|
|    | 265 | 53 | 10 | Absent  | J | J/J |
|    | 266 | 60 | 12 | Present | J | J/J |
|    | 267 | 58 | 8  | Absent  | J | J/J |
|    | 268 | 52 | 8  | Absent  | J | J/J |
|    | 269 | 45 | 5  | Absent  | J | M/M |
|    | 270 | 58 | 7  | Absent  | J | J/J |
| QB | 350 | 46 | 0  | Absent  | M | M/M |
|    | 351 | 51 | 0  | Absent  | M | M/M |
|    | 352 | 43 | 0  | Absent  | M | J/J |
|    | 353 | 43 | 0  | Absent  | M | M/M |
|    | 355 | 43 | 0  | Absent  | M | J/M |
|    | 356 | 33 | 1  | Absent  | J | J/J |
|    | 357 | 52 | 0  | Absent  | M | J/M |
|    | 358 | 41 | 0  | Absent  | M | M/M |
|    | 359 | 53 | 0  | Absent  | M | M/M |
|    | 360 | 44 | 1  | Absent  | M | M/M |
|    | 361 | 54 | 0  | Absent  | M | M/M |
| SK | 392 | 46 | 4  | Absent  | J | J/J |
|    | 393 | 41 | 3  | Absent  | J | J/J |
|    | 394 | 53 | 6  | Absent  | J | M/M |
|    | 395 | 53 | 5  | Absent  | J | J/M |
|    | 396 | 42 | 6  | Absent  | J | J/J |
|    | 397 | 30 | 0  | Absent  | J | J/J |
|    | 398 | 51 | 1  | Absent  | J | J/J |
|    | 399 | 35 | 3  | Absent  | J | J/J |
|    | 400 | 47 | 2  | Absent  | J | J/J |
|    | 401 | 53 | 1  | Absent  | J | J/J |
| RR | 457 | 38 | 0  | Present | T | T/T |
|    | 459 | 51 | 1  | Absent  | J | J/J |
|    | 460 | 51 | 1  | Absent  | J | J/J |
|    | 461 | 33 | 6  | Absent  | J | J/T |
|    | 462 | 50 | 4  | Absent  | J | J/J |
|    | 463 | 55 | 5  | Absent  | J | J/J |
|    | 464 | 54 | 5  | Absent  | J | J/J |
|    | 465 | 41 | 3  | Absent  | J | J/J |
|    | 466 | 34 | 3  | Absent  | J | J/T |
|    | 467 | 45 | 5  | Absent  | J | J/J |
|    | 468 | 49 | 3  | Absent  | J | J/J |
|    | 469 | 50 | 4  | Absent  | J | J/J |
|    | 470 | 31 | 2  | Absent  | J | J/J |
|    | 471 | 56 | 0  | Present | T | T/T |
| MH | 471 | 50 | 0  | Absent  | M | M/M |
|    | 472 | 34 | 0  | Absent  | M | M/M |
|    | 473 | 45 | 0  | Absent  | M | J/M |
|    | 474 | 52 | 0  | Absent  | M | J/J |
|    | 475 | 53 | 1  | Absent  | M | J/M |
|    | 476 | 54 | 0  | Absent  | M | M/M |
|    | 477 | 40 | 0  | Absent  | M | M/M |
|    | 478 | 38 | 0  | Absent  | M | M/M |
|    | 479 | 47 | 0  | Absent  | M | M/M |
|    | 480 | 47 | 0  | Absent  | M | M/M |
|    | 481 | 30 | 0  | Absent  | M | M/M |
|    | 482 | 48 | 0  | Absent  | M | J/J |

|    |     |    |    |        |   |     |
|----|-----|----|----|--------|---|-----|
|    | 483 | 54 | 0  | Absent | M | J/M |
|    | 484 | 53 | 1  | Absent | M | J/M |
|    | 485 | 42 | 0  | Absent | M | J/M |
| QS | 486 | 36 | 1  | Absent | J | J/M |
|    | 487 | 58 | 3  | Absent | J | J/M |
|    | 488 | 52 | 2  | Absent | J | J/J |
|    | 489 | 49 | 1  | Absent | J | J/M |
|    | 490 | 33 | 5  | Absent | J | J/M |
|    | 491 | 44 | 0  | Absent | M | M/M |
|    | 492 | 41 | 0  | Absent | J | J/J |
|    | 493 | 48 | 4  | Absent | J | J/M |
|    | 494 | 48 | 4  | Absent | J | J/J |
|    | 495 | 60 | 1  | Absent | M | J/M |
|    | 496 | 43 | 1  | Absent | J | J/M |
|    | 497 | 46 | 3  | Absent | J | J/J |
|    | 498 | 45 | 2  | Absent | J | J/J |
|    | 499 | 54 | 4  | Absent | J | J/J |
|    | 500 | 36 | 2  | Absent | J | J/M |
| QU | 501 | 43 | 0  | Absent | M | J/M |
|    | 502 | 45 | 0  | Absent | M | M/M |
|    | 503 | 44 | 0  | Absent | M | J/M |
|    | 504 | 48 | 0  | Absent | M | M/M |
|    | 505 | 44 | 0  | Absent | M | M/M |
|    | 506 | 55 | 0  | Absent | M | M/M |
|    | 507 | 49 | 1  | Absent | M | M/M |
|    | 508 | 48 | 0  | Absent | M | M/M |
|    | 509 | 56 | 0  | Absent | M | M/M |
|    | 510 | 58 | 1  | Absent | M | M/M |
|    | 511 | 52 | 0  | Absent | M | M/M |
|    | 512 | 60 | 0  | Absent | M | M/M |
|    | 513 | 38 | 0  | Absent | M | M/M |
|    | 514 | 33 | 0  | Absent | M | J/M |
|    | 515 | 41 | 0  | Absent | M | J/M |
| HY | 516 | 34 | 7  | Absent | J | M/M |
|    | 517 | 35 | 1  | Absent | J | J/J |
|    | 518 | 56 | 1  | Absent | J | J/J |
|    | 519 | 32 | 1  | Absent | J | J/J |
|    | 520 | 51 | 5  | Absent | J | J/J |
|    | 521 | 46 | 2  | Absent | J | J/T |
|    | 522 | 44 | 7  | Absent | J | J/J |
|    | 523 | 37 | 1  | Absent | J | J/M |
|    | 524 | 54 | 3  | Absent | J | J/J |
|    | 525 | 48 | 1  | Absent | J | J/J |
| RF | 642 | 51 | 8  | Absent | J | J/J |
|    | 643 | 36 | 8  | Absent | J | J/J |
|    | 644 | 42 | 3  | Absent | J | J/J |
|    | 645 | 44 | 11 | Absent | J | J/J |
|    | 646 | 50 | 11 | Absent | J | J/J |
|    | 647 | 58 | 10 | Absent | J | J/J |
|    | 648 | 59 | 7  | Absent | J | J/J |
|    | 649 | 58 | 9  | Absent | J | J/J |
|    | 650 | 36 | 10 | Absent | J | J/J |
|    | 651 | 32 | 9  | Absent | J | J/J |

|              |    |     |    |    |         |   |     |
|--------------|----|-----|----|----|---------|---|-----|
|              |    | 652 | 57 | 11 | Absent  | J | J/J |
|              |    | 653 | 54 | 6  | Absent  | J | J/J |
|              |    | 654 | 32 | 5  | Absent  | J | J/J |
|              | BN | 655 | 39 | 9  | Absent  | J | J/J |
|              |    | 656 | 39 | 6  | Absent  | J | J/J |
|              |    | 657 | 55 | 11 | Absent  | J | J/J |
|              |    | 658 | 53 | 9  | Absent  | J | J/J |
|              |    | 659 | 57 | 11 | Absent  | J | J/J |
|              |    | 660 | 54 | 5  | Absent  | J | J/J |
|              |    | 661 | 59 | 12 | Absent  | J | J/J |
|              |    | 662 | 49 | 13 | Absent  | J | J/J |
|              |    | 663 | 48 | 7  | Absent  | J | J/J |
|              |    | 664 | 53 | 1  | Absent  | J | J/J |
| Palmer Creek | BE | 598 | 50 | 0  | Absent  | M | M/M |
|              |    | 599 | 43 | 0  | Absent  | M | M/M |
|              |    | 600 | 54 | 0  | Absent  | M | M/M |
|              |    | 601 | 43 | 1  | Present | M | J/J |
|              |    | 602 | 55 | 0  | Absent  | M | M/M |
|              |    | 603 | 46 | 0  | Absent  | M | M/M |
|              |    | 604 | 47 | 0  | Absent  | M | J/M |
|              |    | 605 | 46 | 0  | Absent  | M | M/M |
|              |    | 606 | 38 | 0  | Absent  | M | J/M |
|              |    | 607 | 49 | 0  | Absent  | M | M/M |
|              |    | 608 | 52 | 0  | Absent  | M | J/J |
|              |    | 609 | 49 | 0  | Present | M | M/M |
|              |    | 610 | 53 | 0  | Absent  | M | M/M |
|              |    | 611 | 38 | 0  | Present | T | T/T |
|              | BD | 612 | 51 | 1  | Absent  | M | M/M |
|              |    | 613 | 51 | 0  | Present | M | M/M |
|              |    | 614 | 49 | 0  | Absent  | M | M/M |
|              |    | 615 | 53 | 0  | Absent  | M | J/M |
|              |    | 616 | 49 | 1  | Present | M | M/M |
|              |    | 618 | 55 | 0  | Present | T | T/T |
|              |    | 619 | 69 | 0  | Present | T | T/T |
|              |    | 620 | 32 | 0  | Absent  | M | J/M |
|              |    | 621 | 58 | 0  | Present | T | T/T |
|              |    | 622 | 33 | 0  | Present | T | J/T |
|              |    | 623 | 32 | 1  | Absent  | M | M/M |
|              |    | 624 | 61 | 0  | Present | T | T/T |
|              |    | 625 | 63 | 0  | Present | T | T/T |
|              | BC | 626 | 48 | 1  | Absent  | M | M/M |
|              |    | 627 | 48 | 0  | Absent  | M | J/M |
|              |    | 628 | 55 | 0  | Present | M | J/M |
|              |    | 629 | 42 | 1  | Absent  | M | M/M |
|              |    | 630 | 39 | 0  | Absent  | M | M/M |
|              |    | 631 | 50 | 1  | Absent  | M | J/J |
|              |    | 632 | 55 | 0  | Absent  | M | J/M |
|              |    | 633 | 53 | 1  | Absent  | M | J/J |
|              |    | 634 | 44 | 1  | Absent  | M | J/M |
|              |    | 635 | 33 | 0  | Absent  | M | J/M |
|              |    | 636 | 47 | 0  | Absent  | M | M/M |
|              |    | 637 | 57 | 0  | Absent  | M | T/T |
|              |    | 638 | 57 | 1  | Present | M | M/M |

|             |    |     |    |    |         |   |     |
|-------------|----|-----|----|----|---------|---|-----|
|             |    | 639 | 53 | 0  | Present | T | T/T |
|             |    | 640 | 63 | 0  | Present | T | T/T |
|             |    | 641 | 64 | 0  | Present | T | T/T |
|             | BF | 725 | 43 | 0  | Absent  | M | J/M |
|             |    | 726 | 44 | 0  | Absent  | M | M/M |
|             |    | 727 | 38 | 0  | Absent  | M | J/M |
|             |    | 728 | 40 | 0  | Absent  | M | M/M |
|             |    | 729 | 47 | 0  | Absent  | M | M/M |
|             |    | 730 | 55 | 0  | Absent  | M | M/M |
|             |    | 731 | 54 | 1  | Absent  | M | J/J |
|             |    | 732 | 56 | 0  | Absent  | M | J/J |
|             |    | 733 | 46 | 0  | Absent  | M | J/M |
|             |    | 734 | 55 | 0  | Absent  | M | J/M |
|             |    | 735 | 48 | 3  | Absent  | M | J/M |
|             |    | 736 | 40 | 1  | Absent  | M | J/M |
|             |    | 737 | 55 | 0  | Absent  | M | M/M |
|             | BJ | 738 | 57 | 1  | Absent  | M | M/M |
|             |    | 739 | 48 | 0  | Absent  | M | J/M |
|             |    | 740 | 40 | 1  | Absent  | M | J/M |
|             |    | 741 | 38 | 0  | Absent  | M | M/M |
|             |    | 742 | 66 | 0  | Present | T | T/T |
|             | BK | 743 | 52 | 0  | Present | T | T/T |
|             |    | 744 | 60 | 0  | Present | T | T/T |
|             |    | 745 | 61 | 0  | Present | T | T/T |
|             |    | 746 | 58 | 0  | Present | T | T/T |
|             |    | 747 | 69 | 1  | Present | T | T/T |
|             |    | 748 | 54 | 0  | Present | T | T/T |
|             |    | 749 | 70 | 0  | Present | T | T/T |
|             |    | 750 | 72 | 0  | Present | T | T/T |
| Mt Sterling | ZI | 752 | 46 | 2  | Present | J | J/T |
|             |    | 753 | 48 | 8  | Absent  | J | J/J |
|             |    | 754 | 56 | 5  | Absent  | J | J/J |
|             |    | 755 | 50 | 5  | Absent  | J | J/J |
|             |    | 756 | 36 | 3  | Present | J | J/J |
|             |    | 757 | 38 | 6  | Absent  | J | J/J |
|             |    | 758 | 49 | 10 | Absent  | J | J/J |
|             |    | 762 | 52 | 6  | Absent  | J | J/J |
|             |    | 763 | 35 | 3  | Absent  | J | J/J |
|             |    | 764 | 42 | 1  | Absent  | M | J/J |
|             |    | 765 | 46 | 8  | Absent  | M | J/J |
|             |    | 766 | 49 | 5  | Absent  | M | J/J |
|             | ZB | 767 | 65 | 0  | Present | T | T/T |
|             |    | 768 | 52 | 0  | Present | T | T/T |
|             |    | 769 | 51 | 0  | Present | T | T/T |
|             |    | 770 | 76 | 0  | Present | T | T/T |
|             |    | 771 | 35 | 0  | Present | T | T/T |
|             |    | 772 | 53 | 0  | Present | T | T/T |
|             |    | 774 | 65 | 0  | Present | T | T/T |
|             |    | 777 | 36 | 0  | Present | T | T/T |
|             |    | 778 | 35 | 0  | Present | T | T/T |
|             |    | 779 | 57 | 0  | Present | T | T/T |
|             | ZE | 780 | 59 | 2  | Absent  | T | J/J |
|             |    | 781 | 63 | 0  | Present | T | J/T |

|    |     |    |    |         |   |     |
|----|-----|----|----|---------|---|-----|
|    | 782 | 56 | 0  | Present | M | J/J |
|    | 783 | 55 | 1  | Present | M | T/T |
|    | 784 | 43 | 0  | Absent  | T | J/J |
|    | 785 | 54 | 0  | Present | M | J/T |
|    | 786 | 43 | 4  | Present | T | J/J |
|    | 787 | 57 | 5  | Absent  | M | J/T |
|    | 788 | 55 | 0  | Present | T | J/J |
|    | 789 | 58 | 2  | Absent  | T | J/J |
|    | 790 | 44 | 7  | Present | M | J/T |
| ZD | 791 | 49 | 0  | Present | T | T/T |
|    | 792 | 62 | 1  | Absent  | M | J/J |
|    | 794 | 51 | 0  | Present | T | T/T |
|    | 795 | 49 | 1  | Present | T | J/T |
|    | 796 | 52 | 0  | Present | T | T/T |
|    | 797 | 59 | 0  | Present | T | T/T |
|    | 798 | 40 | 0  | Present | T | T/T |
|    | 799 | 48 | 0  | Present | T | T/T |
|    | 800 | 42 | 0  | Present | T | T/T |
|    | 801 | 63 | 0  | Present | T | T/T |
|    | 802 | 64 | 0  | Present | M | J/T |
| ZL | 951 | 39 | 6  | Absent  | J | J/J |
|    | 952 | 34 | 5  | Absent  | J | J/J |
|    | 953 | 36 | 7  | Absent  | J | J/J |
|    | 954 | 52 | 6  | Absent  | M | J/J |
|    | 955 | 50 | 4  | Absent  | J | J/J |
|    | 956 | 57 | 9  | Absent  | J | J/T |
|    | 957 | 53 | 3  | Absent  | M | J/J |
|    | 958 | 52 | 2  | Absent  | J | J/J |
|    | 959 | 54 | 8  | Absent  | J | J/J |
|    | 960 | 50 | 7  | Absent  | M | J/J |
|    | 961 | 52 | 3  | Absent  | J | J/J |
|    | 962 | 45 | 8  | Absent  | M | J/J |
| ZM | 963 | 43 | 4  | Absent  | T | J/J |
|    | 964 | 53 | 4  | Absent  | J | J/J |
|    | 965 | 48 | 4  | Absent  | J | J/J |
|    | 966 | 57 | 8  | Absent  | J | J/J |
|    | 967 | 58 | 9  | Absent  | J | J/T |
|    | 968 | 54 | 7  | Absent  | J | J/J |
|    | 969 | 44 | 6  | Absent  | J | J/J |
|    | 970 | 53 | 10 | Absent  | J | J/J |
|    | 971 | 44 | 4  | Absent  | J | J/J |
|    | 972 | 46 | 11 | Absent  | J | J/J |
| ZK | 973 | 47 | 8  | Absent  | M | J/J |
|    | 974 | 53 | 8  | Absent  | J | J/J |
|    | 975 | 56 | 7  | Absent  | J | J/J |
|    | 976 | 53 | 1  | Absent  | J | J/J |
|    | 977 | 53 | 6  | Absent  | M | J/J |
|    | 978 | 38 | 7  | Absent  | M | J/J |
|    | 979 | 59 | 8  | Absent  | M | J/J |
|    | 980 | 53 | 2  | Absent  | J | J/J |
|    | 981 | 44 | 10 | Absent  | J | J/J |
|    | 982 | 50 | 3  | Absent  | J | J/J |
|    | 983 | 48 | 5  | Absent  | J | J/J |



|    |      |    |   |         |   |     |
|----|------|----|---|---------|---|-----|
|    | 984  | 47 | 6 | Absent  | M | J/J |
| ZJ | 985  | 55 | 3 | Absent  | J | J/J |
|    | 987  | 48 | 3 | Absent  | J | J/T |
|    | 988  | 48 | 2 | Absent  | J | J/T |
|    | 989  | 60 | 5 | Absent  | M | J/J |
|    | 990  | 50 | 1 | Absent  | J | J/J |
|    | 991  | 48 | 0 | Absent  | J | J/J |
|    | 992  | 54 | 7 | Absent  | M | J/J |
|    | 993  | 55 | 1 | Absent  | J | J/J |
|    | 994  | 52 | 8 | Absent  | J | J/J |
|    | 995  | 42 | 3 | Absent  | J | J/J |
| ZH | 996  | 55 | 5 | Absent  | J | J/J |
|    | 997  | 56 | 2 | Absent  | M | J/J |
|    | 998  | 54 | 0 | Absent  | M | J/J |
|    | 999  | 63 | 6 | Absent  | M | J/J |
|    | 1000 | 55 | 8 | Absent  | M | J/J |
|    | 1001 | 57 | 1 | Absent  | M | J/J |
|    | 1002 | 62 | 2 | Absent  | M | J/J |
|    | 1003 | 60 | 3 | Absent  | M | J/J |
|    | 1004 | 60 | 5 | Absent  | M | J/J |
|    | 1005 | 61 | 8 | Absent  | M | J/J |
|    | 1006 | 48 | 3 | Absent  | M | J/J |
|    | 1007 | 40 | 1 | Absent  | M | J/J |
| ZF | 1008 | 34 | 7 | Absent  | M | J/T |
|    | 1009 | 55 | 8 | Absent  | M | J/J |
|    | 1010 | 44 | 5 | Absent  | M | J/J |
|    | 1011 | 51 | 4 | Absent  | M | J/J |
|    | 1012 | 56 | 2 | Absent  | M | J/T |
|    | 1013 | 48 | 6 | Absent  | M | J/J |
|    | 1014 | 51 | 5 | Absent  | M | J/J |
|    | 1015 | 50 | 6 | Absent  | T | T/T |
|    | 1016 | 54 | 1 | Absent  | M | J/J |
|    | 1017 | 52 | 3 | Absent  | M | J/M |
|    | 1018 | 45 | 6 | Absent  | M | J/J |
|    | 1019 | 38 | 3 | Absent  | M | J/J |
| ZG | 1020 | 41 | 9 | Absent  | M | J/M |
|    | 1021 | 57 | 4 | Absent  | M | J/J |
|    | 1022 | 51 | 6 | Absent  | M | J/J |
|    | 1023 | 52 | 3 | Absent  | M | J/T |
|    | 1024 | 53 | 4 | Absent  | M | J/J |
|    | 1025 | 54 | 0 | Absent  | M | J/J |
|    | 1026 | 41 | 7 | Absent  | M | J/J |
|    | 1027 | 44 | 0 | Absent  | M | J/J |
|    | 1028 | 38 | 8 | Absent  | M | J/J |
|    | 1029 | 39 | 5 | Absent  | M | J/J |
| ZC | 1030 | 55 | 9 | Absent  | M | J/J |
|    | 1031 | 60 | 7 | Absent  | T | J/T |
|    | 1032 | 49 | 4 | Present | T | J/T |
|    | 1033 | 37 | 3 | Absent  | T | J/J |
|    | 1034 | 36 | 5 | Present | T | J/J |
|    | 1035 | 36 | 1 | Absent  | M | T/T |
|    | 1036 | 35 | 0 | Present | T | J/T |
|    | 1037 | 35 | 5 | Absent  | T | J/J |

|    |      |    |   |         |   |     |
|----|------|----|---|---------|---|-----|
|    | 1038 | 36 | 2 | Absent  | M | J/T |
|    | 1039 | 50 | 0 | Absent  | M | J/T |
|    | 1040 | 59 | 5 | Absent  | T | J/T |
|    | 1041 | 64 | 1 | Absent  | T | J/J |
|    | 1042 | 55 | 0 | Present | T | J/J |
| ZA | 1043 | 37 | 0 | Present | T | T/T |
|    | 1046 | 55 | 0 | Present | T | T/T |
|    | 1047 | 69 | 0 | Present | T | T/T |
|    | 1048 | 64 | 0 | Present | T | T/T |
|    | 1049 | 57 | 0 | Present | T | T/T |

---

<sup>1</sup> See Figure 1 and Supplemental Table 1 for site locations.

<sup>2</sup> Individual codes are those assigned by the authors.

<sup>3</sup> SVL (Snout Vent Length) was measured from the tip of the snout to the posterior end of the cloaca.

<sup>4</sup> Cheek pigmentation was scored on a scale of 0 to 13, with a score of 0 indicating a complete lack of red pigment and 13 indicating extensive and bright red pigment.
